# Supplementary material for: Performance variability of radiomics machine learning models for the detection of clinically significant prostate cancer in heterogeneous MRI datasets
Source: PubMed Central journal article supplement — Quant Imaging Med Surg. 2022 Nov;12(11):4990–5003. doi: 10.21037/qims-22-265 (PMC9622454; doi:10.21037/qims-22-265), 2022-11
Supplement: qims-12-11-4990-supplementary.pdf [file qims-12-11-4990-supplementary.pdf]

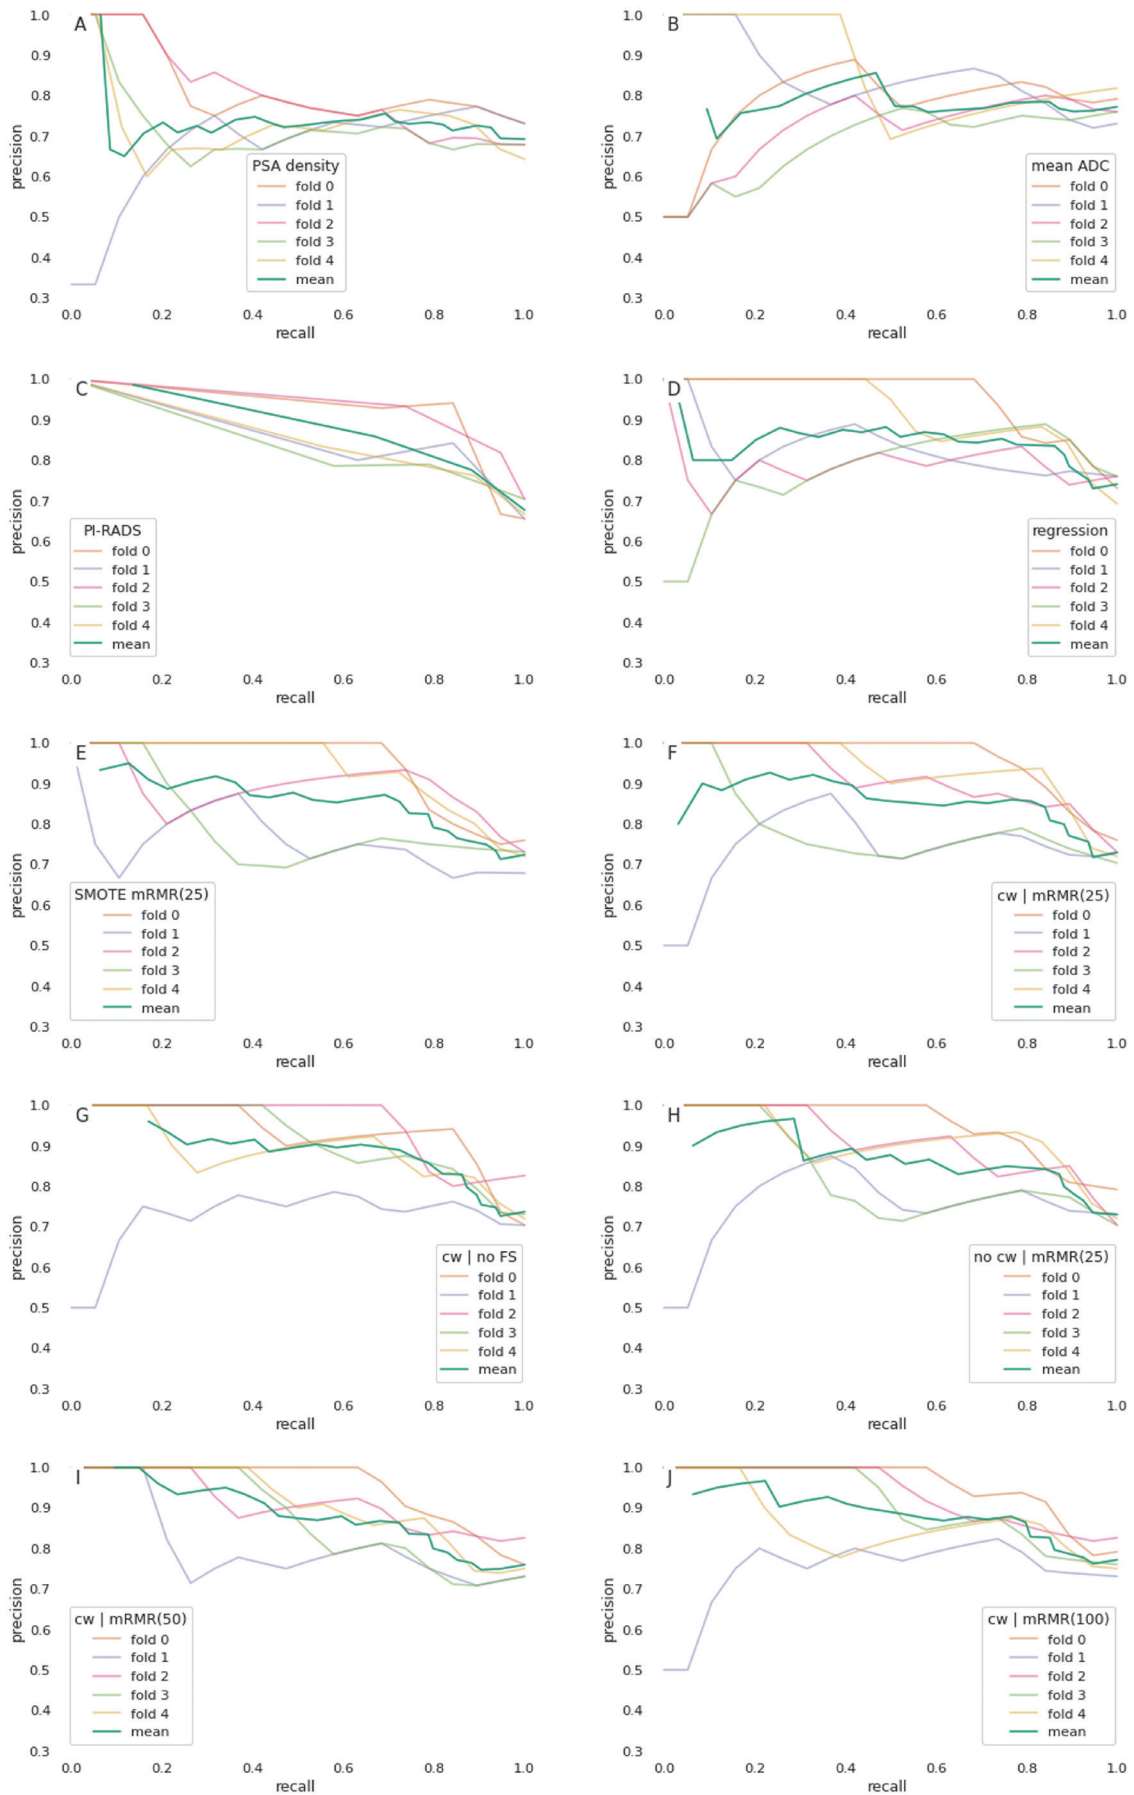

**Figure S1** Precision-recall curves for clinical parameters and radiomic models. (A-C) PR curves for imaging-based biomarkers PSAD, mean ADC and PI-RADS. (D-J) Trained radiomics models with shorthands from *Table 1* in the main manuscript. Dashed lines show PR curves for each of the five CV iterations. Solid green line shows the mean ROC curve over all five CV iterations.

**Table S1** Maximum Youden's index for clinical scores PSA density, mean ADC and PI-RADS, for regression and the random forest models

|                     | PSA density | mean ADC | PI-RADS | Regression | SMOTE mRMR(25) | cw   mRMR(25) | cw   no FS | no cw   mRMR(25) | cw   mRMR(50) | cw   mRMR(100) |
|---------------------|-------------|----------|---------|------------|----------------|---------------|------------|------------------|---------------|----------------|
| Max Youden's (mean) | 0.35        | 0.49     | 0.53    | 0.61       | 0.54           | 0.59          | 0.62       | 0.58             | 0.55          | 0.60           |
| Max Youden's (1)    | 0.45        | 0.54     | 0.74    | 0.74       | 0.74           | 0.74          | 0.79       | 0.69             | 0.68          | 0.74           |
| Max Youden's (2)    | 0.45        | 0.54     | 0.54    | 0.45       | 0.32           | 0.39          | 0.39       | 0.44             | 0.44          | 0.49           |
| Max Youden's (3)    | 0.29        | 0.45     | 0.63    | 0.51       | 0.68           | 0.61          | 0.74       | 0.61             | 0.57          | 0.57           |
| Max Youden's (4)    | 0.18        | 0.33     | 0.35    | 0.67       | 0.29           | 0.40          | 0.57       | 0.40             | 0.42          | 0.57           |
| Max Youden's (5)    | 0.39        | 0.60     | 0.39    | 0.69       | 0.68           | 0.79          | 0.62       | 0.73             | 0.63          | 0.63           |
